# Supplementary material for: Optimization of Evidence-Based Heart Failure Medications After an Acute Heart Failure Admission: A Secondary Analysis of the STRONG-HF Randomized Clinical Trial
Source: PubMed Central journal article supplement (PMC10753435; doi:10.1001/jamacardio.2023.4553), 2023-12-27

## Supplementary Online Content

Cotter G, Deniau B, Davison B, et al. Optimization of evidence-based heart failure medications after an acute heart failure admission: a secondary analysis of the STRONG-HF randomized clinical trial. *JAMA Cardiol*. Published online December 27, 2023.  
doi:10.1001/jamacardio.2023.4553

**eTable 1.** Changes From Week 2 to Day 90 in Vital Signs and Laboratory Data by Average Optimal Dose Categories at Week 2

**eTable 2.** Clinical Outcomes by Average Percentage Optimal Dose Categories at Week 2 in High-Intensity Care Patients

**eTable 3.** Clinical Outcomes by Average Percentage Optimal Dose Categories at Week 2 in All Subjects

**eTable 4.** Treatment Emergent Adverse Events by Average Percentage Optimal Dose Categories at Week 2

**eTable 5.** Treatment Emergent Serious Adverse Events by Average Percentage Optimal Dose Categories at Week 2

**eFigure 1.** Change in NT-ProBNP by Average Percentage Optimal Dose Group at Week 2—High-Intensity Care Subjects

**eFigure 2.** Change in NT-ProBNP by Average Percentage Optimal Dose Group at Week 2 (or Post-Rand For Usual Care)- All Subjects

**eFigure 3.** Change in Potassium by Average Percentage Optimal Dose Group at Week 2—High-Intensity Care Subjects

**eFigure 4.** Change in Potassium by Average Percentage Optimal Dose Group at Week 2 (or Post-Rand for Usual Care)—All Subjects

**eFigure 5.** Change in Creatinine by Average Percentage Optimal Dose Group at Week 2—High-Intensity Care Subjects

**eFigure 6.** Change in Creatinine by Average Percentage Optimal Dose Group at Week 2 (or Post-Rand for Usual Care)—All Subjects

**eFigure 7.** Change in Hemoglobin by Average Percentage Optimal Dose Group at Week 2—High-Intensity Care Subjects

**eFigure 8.** Change in Hemoglobin by Average Percentage Optimal Dose Group at Week 2 (or Post-Rand for Usual Care)—All Subjects

**eFigure 9.** Change in eGFR by average percentage optimal dose group at Week 2—High-Intensity Care Subjects

**eFigure 10.** Change in eGFR by Average Percentage Optimal Dose Group at Week 2 (or Post-Rand for Usual Care)—All Subjects

**eFigure 11.** Kaplan-Meier Curves for All-Cause Mortality or Heart Failure Readmission Through Day 180 by Average Percentage Optimal Dose Category at Week 2—High-Intensity Care Subjects

**eFigure 12.** Kaplan-Meier Curves for All-Cause Mortality or Heart Failure Readmission Through Day 180 by Average Percentage Optimal Dose Category at Week 2—All Subjects

**eFigure 13.** Kaplan-Meier Curves for All-Cause Mortality Through Day 180 by Average Optimal Percentage Dose Category at Week 2—High-Intensity Care Subjects

**eFigure 14.** Kaplan-Meier Curves for All-Cause Mortality Through Day 180 by Average Percentage Optimal Dose Category at Week 2 (or Post-Rand for Usual Care)—All Subjects

**eFigure 15.** Relative Hazard of All-Cause Mortality or Heart Failure Readmission Through Day 180 by Average Percentage Optimal Dose at Week 2 in HIC Patients

**eFigure 16.** Relative Hazard of All-Cause Mortality or Heart Failure Readmission Through Day 180 by Average Percentage Optimal Dose at Week 2 in All Subjects

**eFigure 17.** Relative Hazard of All-Cause Mortality Through Day 180 by Average Percentage Optimal Dose at Week 2 in HIC Patients

**eFigure 18.** Relative Hazard of All-Cause Mortality Through Day 180 by Average Percentage Optimal Dose at Week 2 in All Patients

**eFigure 19.** Change From Baseline in EQ-VAS to Day 90 by Average Percentage Optimal Dose at Week 2 in HIC Patients

**eFigure 20.** Bubble Plot of Percent Optimal Dose of RASi by Beta-Blockers at Week 2

**eFigure 21.** Bubble Plot of Percent Optimal Dose of RASi by MRA at Week 2

**eFigure 22.** Bubble Plot of Percent Optimal Dose of  $\beta$ -Blockers by MRA at Week 2

This supplementary material has been provided by the authors to give readers additional information about their work.

**eTable 1. Changes from week 2 to day 90 in vital signs and laboratory data by average optimal dose categories at week 2**

| Parameter                             | Statistic             | Average Dose <50% (n= 39) | Average Dose >=50-<90% (n=254) | Average Dose >=90% (n=222) |
|---------------------------------------|-----------------------|---------------------------|--------------------------------|----------------------------|
| <b>Vital Signs</b>                    |                       |                           |                                |                            |
| <b>Systolic Blood Pressure, mmHg</b>  |                       |                           |                                |                            |
| Week 2                                | Mean (SD)             | 110.60 ( 15.62)           | 119.81 ( 16.28)                | 124.90 ( 13.64)            |
| Day 90                                | Mean (SD)             | 121.62 ( 17.52)           | 118.94 ( 14.98)                | 118.14 ( 16.28)            |
| Adjusted Mean Change                  | LS Mean (SE)          | 4.38 ( 2.40)              | -1.65 ( 0.91)                  | -4.93 ( 0.96)              |
| LS Mean Difference                    | LS Mean Diff (95% CI) | [ref]                     | -6.03 (-11.05, -1.00)          | -9.31 (-14.43, -4.18)      |
| P-value (vs. reference)               |                       | --                        | 0.02                           | <0.001                     |
| <b>Diastolic Blood Pressure, mmHg</b> |                       |                           |                                |                            |
| Week 2                                | Mean (SD)             | 68.34 ( 11.53)            | 74.28 ( 10.77)                 | 78.13 ( 9.90)              |
| Day 90                                | Mean (SD)             | 73.65 ( 9.58)             | 73.42 ( 10.38)                 | 74.53 ( 10.35)             |
| Adjusted Mean Change                  | LS Mean (SE)          | 1.18 ( 1.63)              | -1.44 ( 0.62)                  | -1.99 ( 0.65)              |
| LS Mean Difference                    | LS Mean Diff (95% CI) | [ref]                     | -2.62 ( -6.03, 0.78)           | -3.18 ( -6.66, 0.31)       |
| P-value (vs. reference)               |                       | --                        | 0.13                           | 0.07                       |
| <b>Heart Rate, beats/min</b>          |                       |                           |                                |                            |
| Week 2                                | Mean (SD)             | 74.31 (14.74)             | 74.00 (13.17)                  | 76.26 (10.11)              |
| Day 90                                | Mean (SD)             | 71.32 (14.21)             | 71.11 (13.55)                  | 71.30 (12.79)              |
| Adjusted Mean Change                  | LS Mean (SE)          | -3.24 ( 2.09)             | -2.89 ( 0.81)                  | -3.98 ( 0.85)              |
| LS Mean Difference                    | LS Mean Diff (95% CI) | [ref]                     | 0.36 ( -4.05, 4.77)            | -0.74 ( -5.18, 3.70)       |
| P-value (vs. reference)               |                       | --                        | 0.87                           | 0.74                       |
| <b>Respiratory Rate, breaths/min</b>  |                       |                           |                                |                            |
| Week 2                                | Mean (SD)             | 18.18 ( 2.26)             | 17.62 ( 2.23)                  | 16.83 ( 2.33)              |
| Day 90                                | Mean (SD)             | 18.03 ( 2.80)             | 17.62 ( 2.45)                  | 16.57 ( 2.15)              |
| Adjusted Mean Change                  | LS Mean (SE)          | 0.26 ( 0.32)              | 0.13 ( 0.12)                   | -0.38 ( 0.13)              |
| LS Mean Difference                    | LS Mean Diff (95% CI) | [ref]                     | -0.13 ( -0.79, 0.53)           | -0.64 ( -1.31, 0.03)       |

| Parameter               | Statistic             | Average Dose <50% (n= 39) | Average Dose >=50-<90% (n=254) | Average Dose >=90% (n=222) |
|-------------------------|-----------------------|---------------------------|--------------------------------|----------------------------|
| P-value (vs. reference) |                       | --                        | 0.70                           | 0.06                       |
| Weight, kg              |                       |                           |                                |                            |
| Week 2                  | Mean (SD)             | 80.12 (20.21)             | 82.81 (19.42)                  | 77.67 (20.99)              |
| Day 90                  | Mean (SD)             | 77.72 (19.10)             | 82.59 (19.42)                  | 77.11 (20.63)              |
| Adjusted Mean Change    | LS Mean (SE)          | -2.85 ( 0.65)             | -0.34 ( 0.25)                  | -0.98 ( 0.26)              |
| LS Mean Difference      | LS Mean Diff (95% CI) | [ref]                     | 2.51 ( 1.14, 3.87)             | 1.87 ( 0.49, 3.24)         |
| P-value (vs. reference) |                       | --                        | <0.001                         | 0.008                      |
| Local Laboratory        |                       |                           |                                |                            |
| Hemoglobin, g/L         |                       |                           |                                |                            |
| Week 2                  | Mean (SD)             | 129.1 (19.83)             | 137.4 (19.26)                  | 133.4 (16.95)              |
| Day 90                  | Mean (SD)             | 127.3 (17.69)             | 134.0 (17.98)                  | 130.6 (15.54)              |
| Adjusted Mean Change    | LS Mean (SE)          | -3.88 ( 2.20)             | -3.41 ( 0.83)                  | -3.22 ( 0.86)              |
| LS Mean Difference      | LS Mean Diff (95% CI) | [ref]                     | 0.47 ( -4.16, 5.10)            | 0.66 ( -3.97, 5.29)        |
| P-value (vs. reference) |                       | --                        | 0.84                           | 0.78                       |
| White Blood Cells,10/L  |                       |                           |                                |                            |
| Week 2                  | Mean (SD)             | 6.74 ( 2.18)              | 7.24 ( 1.94)                   | 6.70 ( 1.82)               |
| Day 90                  | Mean (SD)             | 6.96 ( 1.76)              | 7.12 ( 1.93)                   | 6.57 ( 1.61)               |
| Adjusted Mean Change    | LS Mean (SE)          | -0.07 ( 0.26)             | -0.01 ( 0.10)                  | -0.22 ( 0.10)              |
| LS Mean Difference      | LS Mean Diff (95% CI) | [ref]                     | 0.07 ( -0.48, 0.62)            | -0.15 ( -0.70, 0.40)       |
| P-value (vs. reference) |                       | --                        | 0.81                           | 0.60                       |
| Lymphocytes,%           |                       |                           |                                |                            |
| Week 2                  | Mean (SD)             | 25.88 ( 8.06)             | 27.67 ( 8.83)                  | 28.66 ( 8.88)              |
| Day 90                  | Mean (SD)             | 25.17 ( 9.01)             | 27.73 ( 8.82)                  | 29.02 ( 8.38)              |
| Adjusted Mean Change    | LS Mean (SE)          | -1.29 ( 1.32)             | -0.08 ( 0.50)                  | 0.36 ( 0.53)               |
| LS Mean Difference      | LS Mean Diff (95% CI) | [ref]                     | 1.21 ( -1.57, 3.98)            | 1.64 ( -1.16, 4.45)        |
| P-value (vs. reference) |                       | --                        | 0.39                           | 0.25                       |
| Glucose, mmol/L         |                       |                           |                                |                            |

| Parameter               | Statistic             | Average Dose <50% (n= 39) | Average Dose >=50-<90% (n=254) | Average Dose >=90% (n=222) |
|-------------------------|-----------------------|---------------------------|--------------------------------|----------------------------|
| Week 2                  | Mean (SD)             | 7.03 ( 3.63)              | 6.50 ( 2.58)                   | 5.79 ( 1.95)               |
| Day 90                  | Mean (SD)             | 6.34 ( 2.25)              | 6.74 ( 2.85)                   | 5.85 ( 1.90)               |
| Adjusted Mean Change    | LS Mean (SE)          | -0.19 ( 0.36)             | 0.34 ( 0.13)                   | -0.12 ( 0.14)              |
| LS Mean Difference      | LS Mean Diff (95% CI) | [ref]                     | 0.53 ( -0.21, 1.28)            | 0.07 ( -0.68, 0.81)        |
| P-value (vs. reference) |                       | --                        | 0.16                           | 0.86                       |
| Sodium, mmol/L          |                       |                           |                                |                            |
| Week 2                  | Mean (SD)             | 140.1 ( 5.18)             | 140.7 ( 4.23)                  | 139.6 ( 3.69)              |
| Day 90                  | Mean (SD)             | 141.3 ( 5.34)             | 141.1 ( 4.71)                  | 139.7 ( 3.37)              |
| Adjusted Mean Change    | LS Mean (SE)          | 1.09 ( 0.61)              | 0.58 ( 0.23)                   | -0.10 ( 0.25)              |
| LS Mean Difference      | LS Mean Diff (95% CI) | [ref]                     | -0.51 ( -1.80, 0.78)           | -1.19 ( -2.49, 0.10)       |
| P-value (vs. reference) |                       | --                        | 0.44                           | 0.07                       |
| Potassium, mmol/L       |                       |                           |                                |                            |
| Week 2                  | Mean (SD)             | 4.75 ( 0.66)              | 4.60 ( 0.51)                   | 4.48 ( 0.38)               |
| Day 90                  | Mean (SD)             | 4.65 ( 0.47)              | 4.55 ( 0.54)                   | 4.65 ( 0.37)               |
| Adjusted Mean Change    | LS Mean (SE)          | 0.02 ( 0.08)              | -0.03 ( 0.03)                  | 0.12 ( 0.03)               |
| LS Mean Difference      | LS Mean Diff (95% CI) | [ref]                     | -0.05 ( -0.21, 0.11)           | 0.10 ( -0.06, 0.27)        |
| P-value (vs. reference) |                       | --                        | 0.53                           | 0.22                       |
| Urea, mmol/L            |                       |                           |                                |                            |
| Week 2                  | Mean (SD)             | 10.63 ( 5.85)             | 8.32 ( 3.89)                   | 6.80 ( 2.62)               |
| Day 90                  | Mean (SD)             | 10.00 ( 5.66)             | 8.35 ( 3.99)                   | 6.86 ( 2.90)               |
| Adjusted Mean Change    | LS Mean (SE)          | 0.35 ( 0.52)              | 0.11 ( 0.19)                   | -0.58 ( 0.20)              |
| LS Mean Difference      | LS Mean Diff (95% CI) | [ref]                     | -0.24 ( -1.31, 0.84)           | -0.93 ( -2.03, 0.18)       |
| P-value (vs. reference) |                       | --                        | 0.67                           | 0.10                       |
| eGFR, ml/min/1.732      |                       |                           |                                |                            |
| Week 2                  | Mean (SD)             | 56.35 (24.49)             | 62.30 (22.44)                  | 68.33 (21.28)              |
| Day 90                  | Mean (SD)             | 59.95 (22.56)             | 62.86 (22.64)                  | 66.79 (21.45)              |
| Adjusted Mean Change    | LS Mean (SE)          | 2.91 ( 2.45)              | 0.23 ( 0.92)                   | -0.37 ( 0.96)              |
| LS Mean Difference      | LS Mean Diff (95% CI) | [ref]                     | -2.69 ( -7.82, 2.45)           | -3.28 ( -8.48, 1.92)       |

| Parameter               | Statistic             | Average Dose <50% (n= 39) | Average Dose >=50-<90% (n=254) | Average Dose >=90% (n=222) |
|-------------------------|-----------------------|---------------------------|--------------------------------|----------------------------|
| P-value (vs. reference) |                       | --                        | 0.30                           | 0.22                       |
| Uric Acid, umol/L       |                       |                           |                                |                            |
| Week 2                  | Mean (SD)             | 433.0 (105.9)             | 412.8 (123.0)                  | 405.4 (83.97)              |
| Day 90                  | Mean (SD)             | 412.7 (115.0)             | 392.2 (110.0)                  | 404.4 (94.76)              |
| Adjusted Mean Change    | LS Mean (SE)          | -12.2 (17.23)             | -17.8 ( 6.55)                  | -5.83 ( 6.48)              |
| LS Mean Difference      | LS Mean Diff (95% CI) | [ref]                     | -5.60 (-41.87, 30.66)          | 6.33 (-29.88, 42.54)       |
| P-value (vs. reference) |                       | --                        | 0.76                           | 0.73                       |
| AST, U/L                |                       |                           |                                |                            |
| Week 2                  | Mean (SD)             | 25.73 (13.04)             | 26.69 (13.30)                  | 23.24 (16.42)              |
| Day 90                  | Mean (SD)             | 33.17 (46.71)             | 24.48 (10.91)                  | 24.27 (44.05)              |
| Adjusted Mean Change    | LS Mean (SE)          | 7.88 ( 5.32)              | -2.15 ( 2.09)                  | 1.36 ( 2.19)               |
| LS Mean Difference      | LS Mean Diff (95% CI) | [ref]                     | -10.04 (-21.27, 1.20)          | -6.53 (-17.85, 4.79)       |
| P-value (vs. reference) |                       | --                        | 0.08                           | 0.26                       |
| ALT, U/L                |                       |                           |                                |                            |
| Week 2                  | Mean (SD)             | 22.90 (12.75)             | 28.09 (30.68)                  | 22.42 (21.50)              |
| Day 90                  | Mean (SD)             | 41.55 (115.6)             | 23.44 (12.30)                  | 20.92 (13.71)              |
| Adjusted Mean Change    | LS Mean (SE)          | 19.50 ( 6.24)             | -1.99 ( 2.47)                  | -3.70 ( 2.58)              |
| LS Mean Difference      | LS Mean Diff (95% CI) | [ref]                     | -21.49 (-34.69, -8.29)         | -23.21 (-36.46, -9.95)     |
| P-value (vs. reference) |                       | --                        | 0.002                          | <0.001                     |
| Total Bilirubin, umol/L |                       |                           |                                |                            |
| Week 2                  | Mean (SD)             | 15.94 ( 8.43)             | 15.70 ( 9.77)                  | 12.31 ( 5.44)              |
| Day 90                  | Mean (SD)             | 15.65 ( 9.54)             | 15.24 ( 9.96)                  | 12.91 ( 7.33)              |
| Adjusted Mean Change    | LS Mean (SE)          | 0.13 ( 1.58)              | 0.68 ( 0.59)                   | -0.44 ( 0.62)              |
| LS Mean Difference      | LS Mean Diff (95% CI) | [ref]                     | 0.55 ( -2.76, 3.86)            | -0.56 ( -3.92, 2.79)       |
| P-value (vs. reference) |                       | --                        | 0.74                           | 0.74                       |

| Parameter                         | Statistic             | Average Dose <50% (n= 39) | Average Dose >=50-<90% (n=254) | Average Dose >=90% (n=222) |
|-----------------------------------|-----------------------|---------------------------|--------------------------------|----------------------------|
| Total Cholesterol, mmol/L         |                       |                           |                                |                            |
| Week 2                            | Mean (SD)             | 4.13 ( 1.18)              | 4.23 ( 1.07)                   | 4.59 ( 1.09)               |
| Day 90                            | Mean (SD)             | 4.35 ( 1.23)              | 4.38 ( 1.13)                   | 4.46 ( 0.90)               |
| Adjusted Mean Change              | LS Mean (SE)          | 0.15 ( 0.16)              | 0.05 ( 0.06)                   | -0.05 ( 0.06)              |
| LS Mean Difference                | LS Mean Diff (95% CI) | [ref]                     | -0.09 ( -0.43, 0.25)           | -0.20 ( -0.54, 0.14)       |
| P-value (vs. reference)           |                       | --                        | 0.59                           | 0.25                       |
| NT-proBNP, pg/mL                  |                       |                           |                                |                            |
| Week 2                            | Geo. Mean (95% CI)    | 3458.3 (2467.4, 4847.0)   | 2885.9 (2551.8, 3263.9)        | 1661.1 (1459.0, 1891.3)    |
| Day 90                            | Geo. Mean (95% CI)    | 2325.1 (1657.0, 3262.6)   | 1635.3 (1409.7, 1897.0)        | 978.0 (840.2, 1138.3)      |
| Adjusted Mean Change <sup>a</sup> | LS Mean (SE)          | 0.73 (0.18)               | 0.64 (0.07)                    | 0.51 (0.07)                |
| LS Mean Difference                | LS Mean Diff (95% CI) | [ref]                     | 0.87 (0.60, 1.27)              | 0.70 (0.48, 1.03)          |
| P-value (vs. reference)           |                       | --                        | 0.48                           | 0.07                       |

[a] Statistics are estimated based on an Analysis of Covariance (ANCOVA) model adjusted for Week 2 value.



**eTable 2. Clinical outcomes by average percentage optimal dose categories at week 2 in high intensity care patients**

| Endpoint                                                | n/N (KM%)      | Unadjusted                  |         | Adjusted                    |         |
|---------------------------------------------------------|----------------|-----------------------------|---------|-----------------------------|---------|
|                                                         |                | HR (95% CI)                 | P-value | HR (95% CI)                 | P-value |
| All-cause death or heart failure readmission by day 180 |                |                             | 0.47    |                             | 0.75    |
| Average Dose <50%                                       | 6/31 (18.9%)   | [ref]                       |         | [ref]                       |         |
| Average Dose ≥50% - <90%                                | 31/234 (13.3%) | 0.70 (0.27, 1.84)           |         | 0.76 (0.29, 2.01)           |         |
| Average Dose ≥90%                                       | 23/214 (11.3%) | 0.55 (0.20, 1.49)           |         | 0.68 (0.25, 1.86)           |         |
| Test of Proportional Hazards                            |                |                             | 0.12    |                             |         |
| All-cause death by day 180                              |                |                             | 0.81    |                             | 0.96    |
| Average Dose <50%                                       | 3/34 (9.4%)    | [ref]                       |         | [ref]                       |         |
| Average Dose ≥50% - <90%                                | 14/235 (6.6%)  | 0.70 (0.18, 2.73)           |         | 0.94 (0.22, 3.99)           |         |
| Average Dose ≥90%                                       | 12/214 (6.1%)  | 0.63 (0.16, 2.54)           |         | 0.80 (0.18, 3.58)           |         |
| Test of Proportional Hazards                            |                |                             | 0.87    |                             |         |
|                                                         | LS-Mean (SE)   | LS-Mean Difference (95% CI) |         | LS-Mean Difference (95% CI) |         |
| EQ-VAS Change from Baseline to Visit 7                  |                |                             | 0.001   |                             | 0.07    |
| Average Dose <50%                                       | 7.01 (2.42)    | [ref]                       |         | [ref]                       |         |
| Average Dose ≥50% - <90%                                | 8.57 (0.94)    | 1.56 (-3.50, 6.61)          |         | 0.10 (-4.88, 5.07)          |         |
| Average Dose ≥90%                                       | 13.51 (1.01)   | 6.50 (1.39, 11.61)          |         | 3.13 (-1.98, 8.24)          |         |

**eTable 3. Clinical outcomes by average percentage optimal dose categories at week 2 in all subjects**

| Endpoint                                                | n/N (KM%)      | Unadjusted                  |         | Adjusted                    |         |
|---------------------------------------------------------|----------------|-----------------------------|---------|-----------------------------|---------|
|                                                         |                | HR (95% CI)                 | P-value | HR (95% CI)                 | P-value |
| All-cause death or heart failure readmission by day 180 |                |                             | 0.009   |                             | 0.02    |
| Average Dose <50%                                       | 92/444 (22.0%) | [ref]                       |         | [ref]                       |         |
| Average Dose ≥50% - <90%                                | 49/317 (16.6%) | 0.73 (0.50, 1.07)           |         | 0.71 (0.49, 1.04)           |         |
| Average Dose ≥90%                                       | 23/215 (11.3%) | 0.46 (0.27, 0.77)           |         | 0.50 (0.29, 0.84)           |         |
| Test of Proportional Hazards                            |                |                             | 0.17    |                             |         |
| All-cause death by day 180                              |                |                             | 0.23    |                             | 0.36    |
| Average Dose <50%                                       | 42/446 (9.8%)  | [ref]                       |         | [ref]                       |         |
| Average Dose ≥50% - <90%                                | 20/318 (7.2%)  | 0.70 (0.39, 1.24)           |         | 0.76 (0.42, 1.35)           |         |
| Average Dose ≥90%                                       | 12/215 (6.1%)  | 0.58 (0.28, 1.19)           |         | 0.62 (0.30, 1.29)           |         |
| Test of Proportional Hazards                            |                |                             | 0.04    |                             |         |
|                                                         | LS-Mean (SE)   | LS-Mean Difference (95% CI) |         | LS-Mean Difference (95% CI) |         |
| EQ-VAS Change from Baseline to Visit 7                  |                |                             | <0.001  |                             | <0.001  |
| Average Dose <50%                                       | 6.89 (0.98)    | [ref]                       |         | [ref]                       |         |
| Average Dose ≥50% - <90%                                | 8.68 (0.96)    | 1.80 (-0.26, 3.85)          |         | 1.62 (-0.38, 3.62)          |         |
| Average Dose ≥90%                                       | 12.40 (1.14)   | 5.51 (3.20, 7.82)           |         | 5.21 (2.97, 7.46)           |         |

**eTable 4. Treatment emergent adverse events by average percentage optimal dose categories at week 2**

| System Organ Class<br>Preferred Term | Statistic | Average<br>Dose<br><50%<br>(N=39) | Average<br>Dose<br>>=50-<90%<br>(N=254) | Average<br>Dose<br>>=90%<br>(N=222) | Trend<br>P-value <sup>#</sup> |
|--------------------------------------|-----------|-----------------------------------|-----------------------------------------|-------------------------------------|-------------------------------|
| Any Adverse Event                    | n (%)     | 21 (53.8%)                        | 98 (38.6%)                              | 51 (23.0%)                          | <0.001                        |
| Blood And Lymphatic System Disorders | n (%)     | 1 (2.6%)                          | 0                                       | 2 (0.9%)                            |                               |
| Anaemia                              | n (%)     | 1 (2.6%)                          | 0                                       | 0                                   |                               |
| Anaemia Of Chronic Disease           | n (%)     | 0                                 | 0                                       | 1 (0.5%)                            |                               |
| Febrile Neutropenia                  | n (%)     | 0                                 | 0                                       | 1 (0.5%)                            |                               |
| Leukocytosis                         | n (%)     | 0                                 | 0                                       | 1 (0.5%)                            |                               |
| Cardiac Disorders                    | n (%)     | 8 (20.5%)                         | 49 (19.3%)                              | 23 (10.4%)                          | 0.008                         |
| Acute Coronary Syndrome              | n (%)     | 0                                 | 1 (0.4%)                                | 0                                   |                               |
| Acute Myocardial Infarction          | n (%)     | 1 (2.6%)                          | 1 (0.4%)                                | 1 (0.5%)                            |                               |
| Angina Unstable                      | n (%)     | 0                                 | 1 (0.4%)                                | 0                                   |                               |
| Atrial Fibrillation                  | n (%)     | 0                                 | 2 (0.8%)                                | 0                                   |                               |
| Atrioventricular Block Complete      | n (%)     | 1 (2.6%)                          | 0                                       | 0                                   |                               |
| Bradycardia                          | n (%)     | 0                                 | 0                                       | 2 (0.9%)                            |                               |
| Cardiac Failure                      | n (%)     | 5 (12.8%)                         | 43 (16.9%)                              | 19 (8.6%)                           |                               |
| Cardiac Failure Chronic              | n (%)     | 0                                 | 2 (0.8%)                                | 1 (0.5%)                            |                               |
| Myocardial Infarction                | n (%)     | 0                                 | 0                                       | 1 (0.5%)                            |                               |
| Ventricular Tachycardia              | n (%)     | 1 (2.6%)                          | 0                                       | 0                                   |                               |
| Gastrointestinal Disorders           | n (%)     | 0                                 | 6 (2.4%)                                | 4 (1.8%)                            |                               |
| Abdominal Pain                       | n (%)     | 0                                 | 1 (0.4%)                                | 0                                   |                               |
| Abdominal Pain Upper                 | n (%)     | 0                                 | 0                                       | 1 (0.5%)                            |                               |
| Constipation                         | n (%)     | 0                                 | 0                                       | 1 (0.5%)                            |                               |
| Diarrhoea                            | n (%)     | 0                                 | 2 (0.8%)                                | 2 (0.9%)                            |                               |
| Dry Mouth                            | n (%)     | 0                                 | 0                                       | 1 (0.5%)                            |                               |
| Dyspepsia                            | n (%)     | 0                                 | 1 (0.4%)                                | 1 (0.5%)                            |                               |
| Eructation                           | n (%)     | 0                                 | 1 (0.4%)                                | 0                                   |                               |

| System Organ Class                                   |           | Average Dose <50% (N=39) | Average Dose >=50-<90% (N=254) | Average Dose >=90% (N=222) | Trend P-value <sup>#</sup> |
|------------------------------------------------------|-----------|--------------------------|--------------------------------|----------------------------|----------------------------|
| Preferred Term                                       | Statistic |                          |                                |                            |                            |
| Gastrointestinal Motility Disorder                   | n (%)     | 0                        | 1 (0.4%)                       | 0                          |                            |
| Haemorrhoids                                         | n (%)     | 0                        | 1 (0.4%)                       | 0                          |                            |
| General Disorders And Administration Site Conditions | n (%)     | 1 (2.6%)                 | 4 (1.6%)                       | 2 (0.9%)                   |                            |
| Asthenia                                             | n (%)     | 0                        | 1 (0.4%)                       | 1 (0.5%)                   |                            |
| Fatigue                                              | n (%)     | 0                        | 1 (0.4%)                       | 0                          |                            |
| Sudden Death                                         | n (%)     | 1 (2.6%)                 | 2 (0.8%)                       | 1 (0.5%)                   |                            |
| Hepatobiliary Disorders                              | n (%)     | 0                        | 0                              | 1 (0.5%)                   |                            |
| Hepatitis Acute                                      | n (%)     | 0                        | 0                              | 1 (0.5%)                   |                            |
| Infections And Infestations                          | n (%)     | 3 (7.7%)                 | 16 (6.3%)                      | 4 (1.8%)                   |                            |
| Bronchitis                                           | n (%)     | 0                        | 1 (0.4%)                       | 0                          |                            |
| Bursitis Infective                                   | n (%)     | 0                        | 1 (0.4%)                       | 0                          |                            |
| Corona Virus Infection                               | n (%)     | 0                        | 1 (0.4%)                       | 3 (1.4%)                   |                            |
| Gastroenteritis                                      | n (%)     | 0                        | 1 (0.4%)                       | 0                          |                            |
| Influenza                                            | n (%)     | 0                        | 0                              | 0                          |                            |
| Lower Respiratory Tract Infection                    | n (%)     | 1 (2.6%)                 | 0                              | 0                          |                            |
| Nasopharyngitis                                      | n (%)     | 0                        | 5 (2.0%)                       | 0                          |                            |
| Pneumonia                                            | n (%)     | 2 (5.1%)                 | 2 (0.8%)                       | 0                          |                            |
| Pneumonia Viral                                      | n (%)     | 0                        | 0                              | 1 (0.5%)                   |                            |
| Pyelonephritis                                       | n (%)     | 0                        | 0                              | 1 (0.5%)                   |                            |
| Respiratory Tract Infection Viral                    | n (%)     | 0                        | 3 (1.2%)                       | 0                          |                            |
| Urinary Tract Infection                              | n (%)     | 0                        | 1 (0.4%)                       | 0                          |                            |
| Viral Infection                                      | n (%)     | 0                        | 1 (0.4%)                       | 0                          |                            |
| Vulvovaginal Mycotic Infection                       | n (%)     | 0                        | 1 (0.4%)                       | 0                          |                            |
| Injury, Poisoning And Procedural Complications       | n (%)     | 0                        | 4 (1.6%)                       | 1 (0.5%)                   |                            |
| Contusion                                            | n (%)     | 0                        | 1 (0.4%)                       | 1 (0.5%)                   |                            |
| Fall                                                 | n (%)     | 0                        | 1 (0.4%)                       | 0                          |                            |
| Humerus Fracture                                     | n (%)     | 0                        | 1 (0.4%)                       | 0                          |                            |
| Toxicity To Various Agents                           | n (%)     | 0                        | 1 (0.4%)                       | 0                          |                            |

| System Organ Class                                        |           | Average Dose <50% (N=39) | Average Dose >=50-<90% (N=254) | Average Dose >=90% (N=222) | Trend P-value <sup>#</sup> |
|-----------------------------------------------------------|-----------|--------------------------|--------------------------------|----------------------------|----------------------------|
| Preferred Term                                            | Statistic |                          |                                |                            |                            |
| Investigations                                            | n (%)     | 2 (5.1%)                 | 5 (2.0%)                       | 5 (2.3%)                   | 0.64                       |
| Blood Creatinine Increased                                | n (%)     | 1 (2.6%)                 | 0                              | 1 (0.5%)                   |                            |
| Blood Potassium Increased                                 | n (%)     | 1 (2.6%)                 | 1 (0.4%)                       | 0                          |                            |
| Blood Pressure Increased                                  | n (%)     | 0                        | 3 (1.2%)                       | 1 (0.5%)                   |                            |
| Glomerular Filtration Rate Decreased                      | n (%)     | 0                        | 0                              | 2 (0.9%)                   |                            |
| N-Terminal Prohormone Brain Natriuretic Peptide Increased | n (%)     | 0                        | 1 (0.4%)                       | 1 (0.5%)                   |                            |
| Platelet Count Decreased                                  | n (%)     | 1 (2.6%)                 | 0                              | 0                          |                            |
| Metabolism And Nutrition Disorders                        | n (%)     | 5 (12.8%)                | 9 (3.5%)                       | 3 (1.4%)                   | 0.002                      |
| Decreased Appetite                                        | n (%)     | 0                        | 1 (0.4%)                       | 0                          |                            |
| Dehydration                                               | n (%)     | 0                        | 1 (0.4%)                       | 0                          |                            |
| Hyperkalaemia                                             | n (%)     | 4 (10.3%)                | 6 (2.4%)                       | 3 (1.4%)                   | 0.01                       |
| Hyperuricaemia                                            | n (%)     | 1 (2.6%)                 | 0                              | 0                          |                            |
| Hypoglycaemia                                             | n (%)     | 1 (2.6%)                 | 0                              | 0                          |                            |
| Hypokalaemia                                              | n (%)     | 0                        | 1 (0.4%)                       | 0                          |                            |
| Type 2 Diabetes Mellitus                                  | n (%)     | 0                        | 1 (0.4%)                       | 0                          |                            |
| Musculoskeletal And Connective Tissue Disorders           | n (%)     | 0                        | 3 (1.2%)                       | 3 (1.4%)                   |                            |
| Arthritis                                                 | n (%)     | 0                        | 1 (0.4%)                       | 1 (0.5%)                   |                            |
| Back Pain                                                 | n (%)     | 0                        | 0                              | 1 (0.5%)                   |                            |
| Gouty Arthritis                                           | n (%)     | 0                        | 1 (0.4%)                       | 0                          |                            |
| Muscular Weakness                                         | n (%)     | 0                        | 1 (0.4%)                       | 1 (0.5%)                   |                            |
| Osteochondrosis                                           | n (%)     | 0                        | 0                              | 1 (0.5%)                   |                            |
| Nervous System Disorders                                  | n (%)     | 0                        | 7 (2.8%)                       | 5 (2.3%)                   | 0.82                       |
| Cerebrovascular Accident                                  | n (%)     | 0                        | 2 (0.8%)                       | 1 (0.5%)                   | 1.00                       |
| Dizziness                                                 | n (%)     | 0                        | 3 (1.2%)                       | 0                          |                            |
| Dizziness Exertional                                      | n (%)     | 0                        | 1 (0.4%)                       | 0                          |                            |
| Dizziness Postural                                        | n (%)     | 0                        | 1 (0.4%)                       | 0                          |                            |
| Dysgeusia                                                 | n (%)     | 0                        | 0                              | 1 (0.5%)                   |                            |
| Headache                                                  | n (%)     | 0                        | 0                              | 2 (0.9%)                   |                            |

| System Organ Class                              |           | Average Dose <50% | Average Dose >=50-<90% | Average Dose >=90% | Trend                |
|-------------------------------------------------|-----------|-------------------|------------------------|--------------------|----------------------|
| Preferred Term                                  | Statistic | (N=39)            | (N=254)                | (N=222)            | P-value <sup>#</sup> |
| Hemianopia Homonymous                           | n (%)     | 0                 | 1 (0.4%)               | 0                  |                      |
| Loss Of Consciousness                           | n (%)     | 0                 | 1 (0.4%)               | 0                  |                      |
| Paraesthesia                                    | n (%)     | 0                 | 0                      | 2 (0.9%)           |                      |
| Somnolence                                      | n (%)     | 0                 | 1 (0.4%)               | 0                  |                      |
| Renal And Urinary Disorders                     | n (%)     | 4 (10.3%)         | 6 (2.4%)               | 4 (1.8%)           | 0.05                 |
| Acute Kidney Injury                             | n (%)     | 1 (2.6%)          | 1 (0.4%)               | 0                  |                      |
| Chronic Kidney Disease                          | n (%)     | 1 (2.6%)          | 0                      | 0                  |                      |
| Renal Failure                                   | n (%)     | 0                 | 0                      | 1 (0.5%)           |                      |
| Renal Impairment                                | n (%)     | 2 (5.1%)          | 5 (2.0%)               | 3 (1.4%)           |                      |
| Reproductive System And Breast Disorders        | n (%)     | 0                 | 0                      | 1 (0.5%)           |                      |
| Gynaecomastia                                   | n (%)     | 0                 | 0                      | 1 (0.5%)           |                      |
| Respiratory, Thoracic And Mediastinal Disorders | n (%)     | 1 (2.6%)          | 2 (0.8%)               | 1 (0.5%)           |                      |
| Cough                                           | n (%)     | 0                 | 1 (0.4%)               | 0                  |                      |
| Dyspnoea                                        | n (%)     | 1 (2.6%)          | 0                      | 0                  |                      |
| Pulmonary Embolism                              | n (%)     | 0                 | 0                      | 1 (0.5%)           |                      |
| Pulmonary Oedema                                | n (%)     | 0                 | 1 (0.4%)               | 0                  |                      |
| Skin And Subcutaneous Tissue Disorders          | n (%)     | 0                 | 1 (0.4%)               | 1 (0.5%)           |                      |
| Rash                                            | n (%)     | 0                 | 0                      | 1 (0.5%)           |                      |
| Stasis Dermatitis                               | n (%)     | 0                 | 1 (0.4%)               | 0                  |                      |
| Surgical And Medical Procedures                 | n (%)     | 0                 | 1 (0.4%)               | 1 (0.5%)           |                      |
| Chemotherapy                                    | n (%)     | 0                 | 0                      | 1 (0.5%)           |                      |
| High Frequency Ablation                         | n (%)     | 0                 | 1 (0.4%)               | 0                  |                      |
| Vascular Disorders                              | n (%)     | 2 (5.1%)          | 14 (5.5%)              | 4 (1.8%)           | 0.07                 |
| Hypertension                                    | n (%)     | 0                 | 0                      | 1 (0.5%)           |                      |
| Hypertensive Crisis                             | n (%)     | 0                 | 3 (1.2%)               | 1 (0.5%)           |                      |
| Hypotension                                     | n (%)     | 2 (5.1%)          | 10 (3.9%)              | 2 (0.9%)           | 0.05                 |
| Orthostatic Hypotension                         | n (%)     | 0                 | 2 (0.8%)               | 0                  |                      |

| System Organ Class | Statistic | Average Dose<br><50%<br>(N=39) | Average Dose<br>>=50-<90%<br>(N=254) | Average Dose<br>>=90%<br>(N=222) | Trend<br>P-value <sup>#</sup> |
|--------------------|-----------|--------------------------------|--------------------------------------|----------------------------------|-------------------------------|
| Preferred Term     |           |                                |                                      |                                  |                               |

Including adverse events with onset date equal to or greater than Day 14 through 90 days post-randomization.

<sup>#</sup>: Cochran-Armitage trend test. Exact p-value when <5 events in any category

**eTable 5. Treatment emergent serious adverse events by average percentage optimal dose categories at week 2**

| System Organ Class<br>Preferred Term                    | Statistic | Average<br>Dose<br><50%<br>(N=39) | Average<br>Dose<br>≥50-<90%<br>(N=254) | Average<br>Dose<br>≥90%<br>(N=222) | Trend<br>P-value <sup>#</sup> |
|---------------------------------------------------------|-----------|-----------------------------------|----------------------------------------|------------------------------------|-------------------------------|
| Any Serious Adverse Event                               | n (%)     | 9 (23.1%)                         | 37 (14.6%)                             | 21 (9.5%)                          | 0.012                         |
| Blood And Lymphatic System Disorders                    | n (%)     | 0                                 | 0                                      | 1 (0.5%)                           |                               |
| Febrile Neutropenia                                     | n (%)     | 0                                 | 0                                      | 1 (0.5%)                           |                               |
| Cardiac Disorders                                       | n (%)     | 5 (12.8%)                         | 24 (9.4%)                              | 12 (5.4%)                          | 0.05                          |
| Acute Coronary Syndrome                                 | n (%)     | 0                                 | 1 (0.4%)                               | 0                                  |                               |
| Acute Myocardial Infarction                             | n (%)     | 1 (2.6%)                          | 1 (0.4%)                               | 1 (0.5%)                           | 0.37                          |
| Atrial Fibrillation                                     | n (%)     | 0                                 | 1 (0.4%)                               | 0                                  |                               |
| Atrioventricular Block Complete                         | n (%)     | 1 (2.6%)                          | 0                                      | 0                                  |                               |
| Cardiac Failure                                         | n (%)     | 2 (5.1%)                          | 21 (8.3%)                              | 10 (4.5%)                          | 0.31                          |
| Cardiac Failure Chronic                                 | n (%)     | 0                                 | 0                                      | 1 (0.5%)                           |                               |
| Myocardial Infarction                                   | n (%)     | 0                                 | 0                                      | 1 (0.5%)                           |                               |
| Ventricular Tachycardia                                 | n (%)     | 1 (2.6%)                          | 0                                      | 0                                  |                               |
| Gastrointestinal Disorders                              | n (%)     | 0                                 | 1 (0.4%)                               | 1 (0.5%)                           |                               |
| Abdominal Pain                                          | n (%)     | 0                                 | 1 (0.4%)                               | 0                                  |                               |
| Abdominal Pain Upper                                    | n (%)     | 0                                 | 0                                      | 1 (0.5%)                           |                               |
| Diarrhoea                                               | n (%)     | 0                                 | 0                                      | 1 (0.5%)                           |                               |
| General Disorders And Administration Site<br>Conditions | n (%)     | 1 (2.6%)                          | 2 (0.8%)                               | 1 (0.5%)                           |                               |
| Sudden Death                                            | n (%)     | 1 (2.6%)                          | 2 (0.8%)                               | 1 (0.5%)                           |                               |
| Hepatobiliary Disorders                                 | n (%)     | 0                                 | 0                                      | 1 (0.5%)                           |                               |
| Hepatitis Acute                                         | n (%)     | 0                                 | 0                                      | 1 (0.5%)                           |                               |
| Infections And Infestations                             | n (%)     | 3 (7.7%)                          | 6 (2.4%)                               | 3 (1.4%)                           | 0.06                          |



| System Organ Class                              |           | Average Dose | Average Dose      | Average Dose  | Trend P-value <sup>#</sup> |
|-------------------------------------------------|-----------|--------------|-------------------|---------------|----------------------------|
| Preferred Term                                  | Statistic | <50% (N=39)  | >=50-<90% (N=254) | >=90% (N=222) |                            |
| Bronchitis                                      | n (%)     | 0            | 1 (0.4%)          | 0             |                            |
| Bursitis Infective                              | n (%)     | 0            | 1 (0.4%)          | 0             |                            |
| Corona Virus Infection                          | n (%)     | 0            | 1 (0.4%)          | 2 (0.9%)      |                            |
| Gastroenteritis                                 | n (%)     | 0            | 1 (0.4%)          | 0             |                            |
| Lower Respiratory Tract Infection               | n (%)     | 1 (2.6%)     | 0                 | 0             |                            |
| Pneumonia                                       | n (%)     | 2 (5.1%)     | 2 (0.8%)          | 0             |                            |
| Pneumonia Viral                                 | n (%)     | 0            | 0                 | 1 (0.5%)      |                            |
| Pyelonephritis                                  | n (%)     | 0            | 0                 | 1 (0.5%)      |                            |
| Urinary Tract Infection                         | n (%)     | 0            | 1 (0.4%)          | 0             |                            |
| Injury, Poisoning And Procedural Complications  | n (%)     | 0            | 1 (0.4%)          | 0             |                            |
| Fall                                            | n (%)     | 0            | 1 (0.4%)          | 0             |                            |
| Investigations                                  | n (%)     | 1 (2.6%)     | 0                 | 0             |                            |
| Blood Creatinine Increased                      | n (%)     | 1 (2.6%)     | 0                 | 0             |                            |
| Metabolism And Nutrition Disorders              | n (%)     | 1 (2.6%)     | 0                 | 0             |                            |
| Hyperkalaemia                                   | n (%)     | 1 (2.6%)     | 0                 | 0             |                            |
| Hypoglycaemia                                   | n (%)     | 1 (2.6%)     | 0                 | 0             |                            |
| Musculoskeletal And Connective Tissue Disorders | n (%)     | 0            | 0                 | 1 (0.5%)      |                            |
| Osteochondrosis                                 | n (%)     | 0            | 0                 | 1 (0.5%)      |                            |
| Nervous System Disorders                        | n (%)     | 0            | 3 (1.2%)          | 1 (0.5%)      |                            |
| Cerebrovascular Accident                        | n (%)     | 0            | 2 (0.8%)          | 1 (0.5%)      |                            |
| Hemianopia Homonymous                           | n (%)     | 0            | 1 (0.4%)          | 0             |                            |
| Renal And Urinary Disorders                     | n (%)     | 2 (5.1%)     | 0                 | 1 (0.5%)      | 0.07                       |
| Chronic Kidney Disease                          | n (%)     | 1 (2.6%)     | 0                 | 0             |                            |
| Renal Impairment                                | n (%)     | 1 (2.6%)     | 0                 | 1 (0.5%)      |                            |
| Respiratory, Thoracic And Mediastinal Disorders | n (%)     | 0            | 1 (0.4%)          | 1 (0.5%)      |                            |

| System Organ Class              |           | Average Dose <50% (N=39) | Average Dose >=50-<90% (N=254) | Average Dose >=90% (N=222) | Trend P-value <sup>#</sup> |
|---------------------------------|-----------|--------------------------|--------------------------------|----------------------------|----------------------------|
| Preferred Term                  | Statistic |                          |                                |                            |                            |
| Pulmonary Embolism              | n (%)     | 0                        | 0                              | 1 (0.5%)                   |                            |
| Pulmonary Oedema                | n (%)     | 0                        | 1 (0.4%)                       | 0                          |                            |
| Surgical And Medical Procedures | n (%)     | 0                        | 1 (0.4%)                       | 1 (0.5%)                   |                            |
| Chemotherapy                    | n (%)     | 0                        | 0                              | 1 (0.5%)                   |                            |
| High Frequency Ablation         | n (%)     | 0                        | 1 (0.4%)                       | 0                          |                            |

Including serious adverse events with onset date equal to or greater than Day 14 through 90 days post-randomization.

<sup>#</sup>: Cochran-Armitage trend test. Exact p-value when <5 events in any category

**eFigure 1. Change in NT-proBNP by average percentage optimal dose group at Week 2- High Intensity Care Subjects**

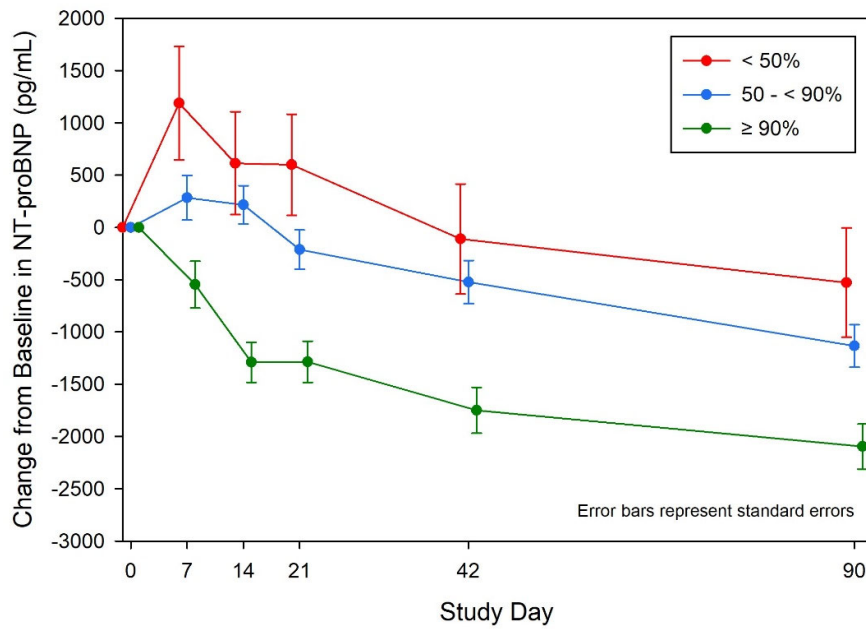

**eFigure 2. Change in NT-proBNP by average percentage optimal dose group at Week 2 (or Post-Rand for Usual Care)- All Subjects**

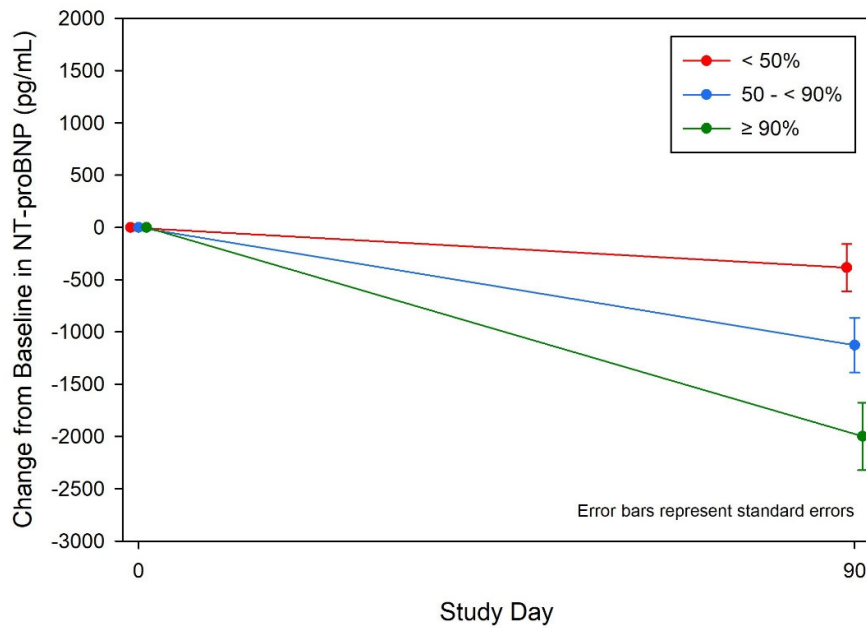

**eFigure 3. Change in Potassium by average percentage optimal dose group at Week 2- High Intensity Care Subjects**

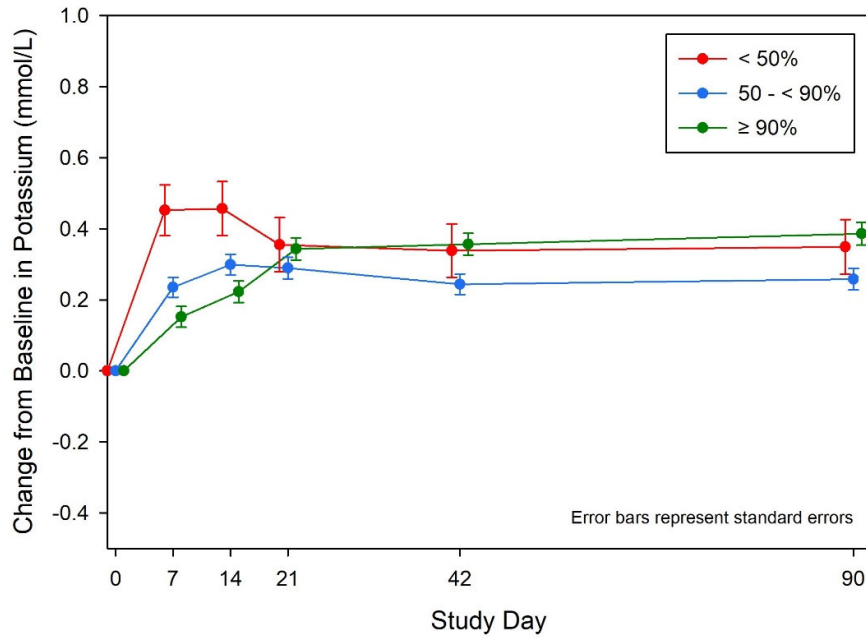

**eFigure 4. Change in Potassium by average percentage optimal dose group at Week 2 (or Post-Rand for Usual Care)- All Subjects**

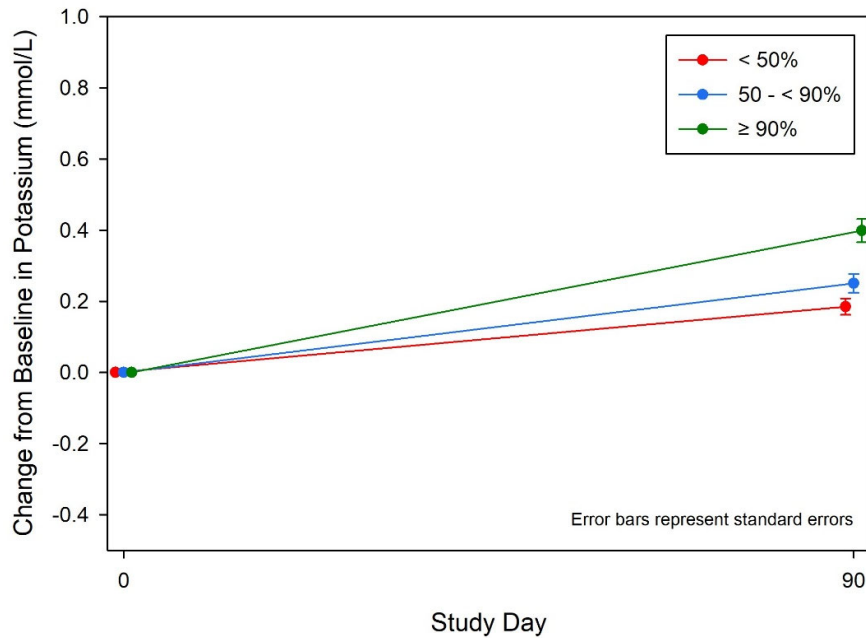

**eFigure 5. Change in Creatinine by average percentage optimal dose group at Week 2- High Intensity Care Subjects**

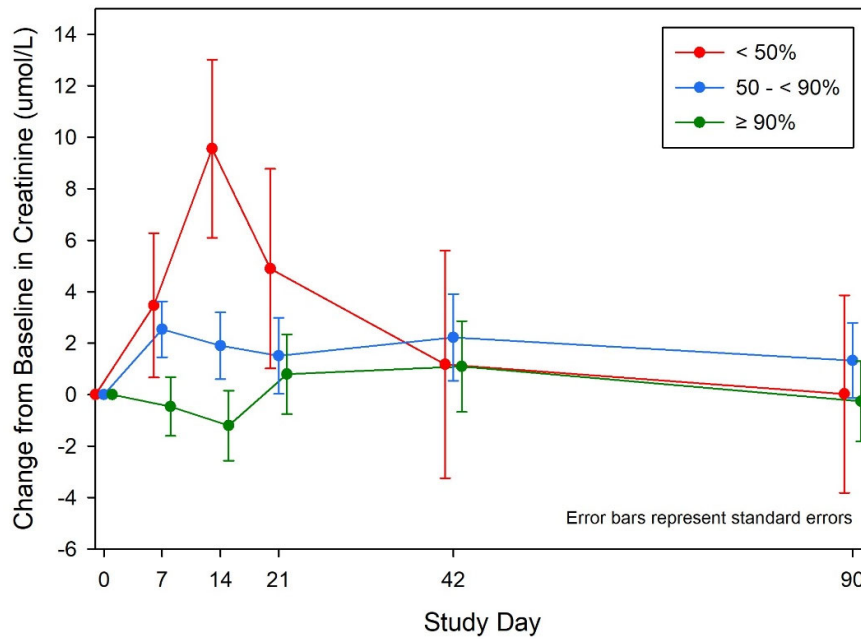

**eFigure 6. Change in Creatinine by average percentage optimal dose group at Week 2 (or Post-Rand for Usual Care)- All Subjects**

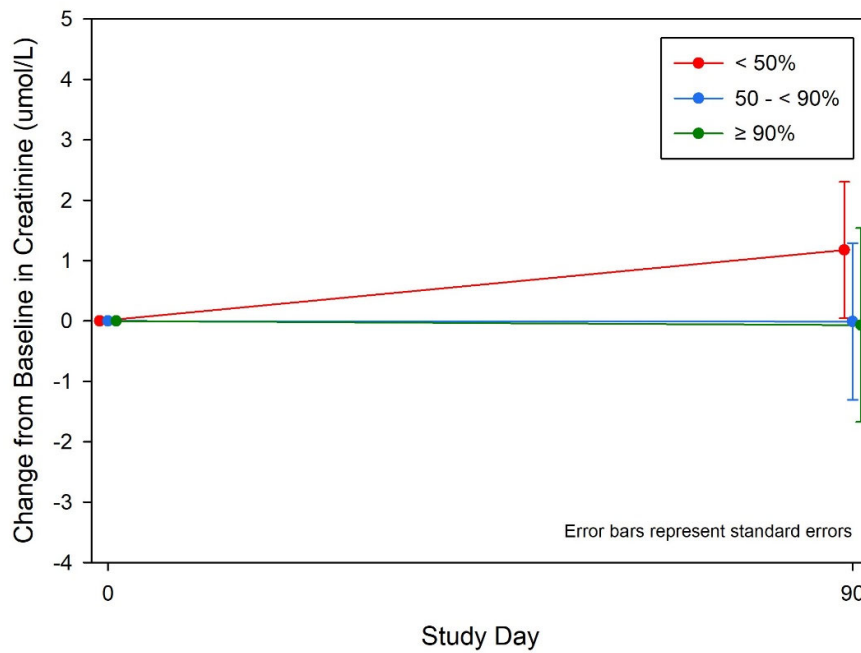

**eFigure 7. Change in Hemoglobin by average percentage optimal dose group at Week 2- High Intensity Care Subjects**

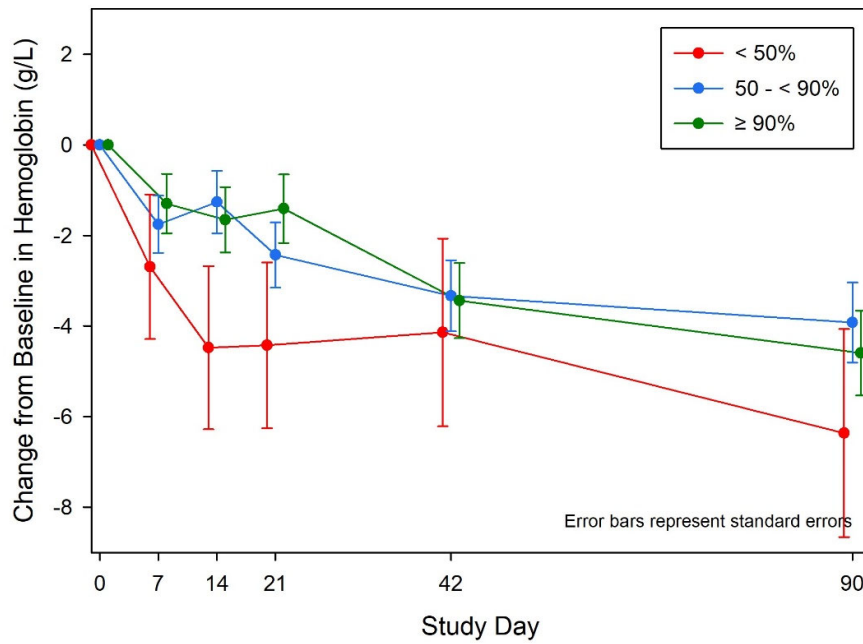

**eFigure 8. Change in Hemoglobin by average percentage optimal dose group at Week 2 (or Post-Rand for Usual Care)- All Subjects**

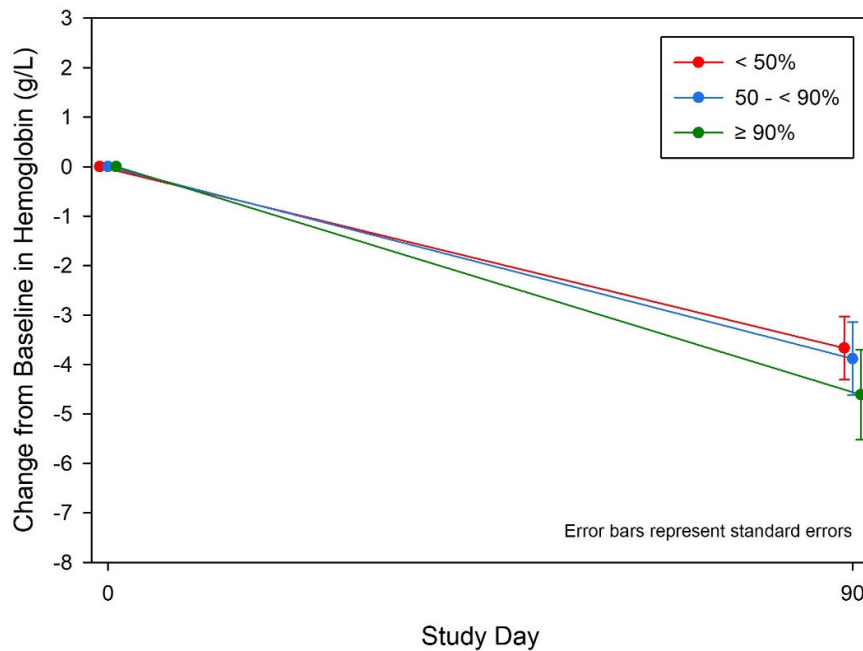

**eFigure 9. Change in eGFR by average percentage optimal dose group at Week 2- High Intensity Care Subjects**

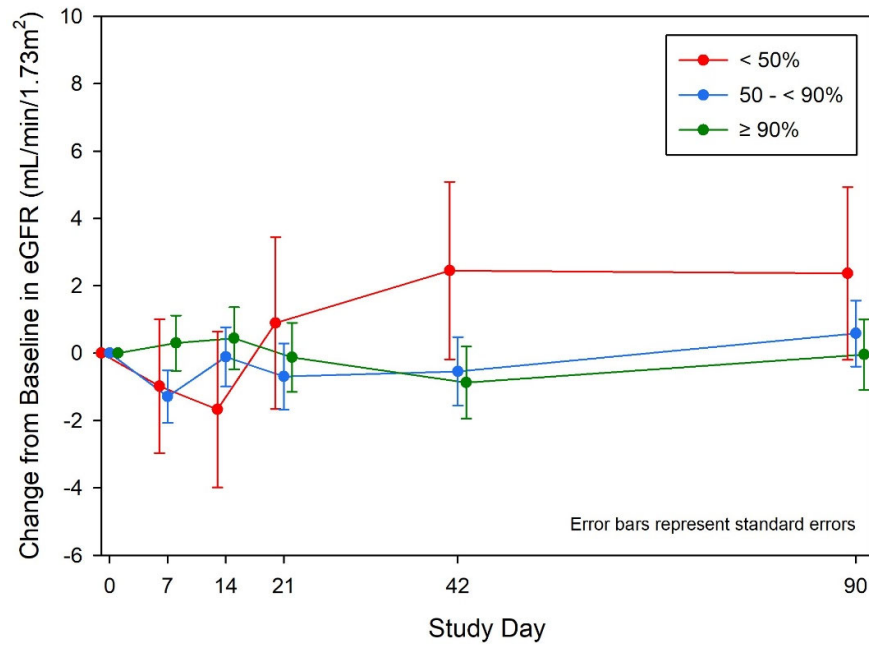

**eFigure 10. Change in eGFR by average percentage optimal dose group at Week 2 (or Post-Rand for Usual Care)- All Subjects**

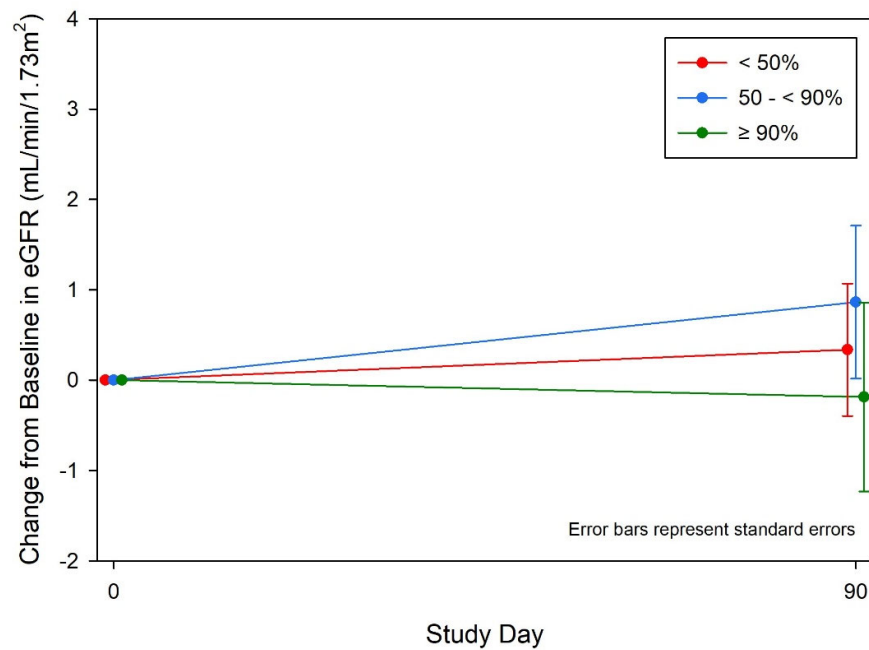

**Figure 11. Kaplan-Meier curves for all-cause mortality or heart failure readmission through day 180 by average percentage optimal dose category at Week 2 – High Intensity Care Subjects**

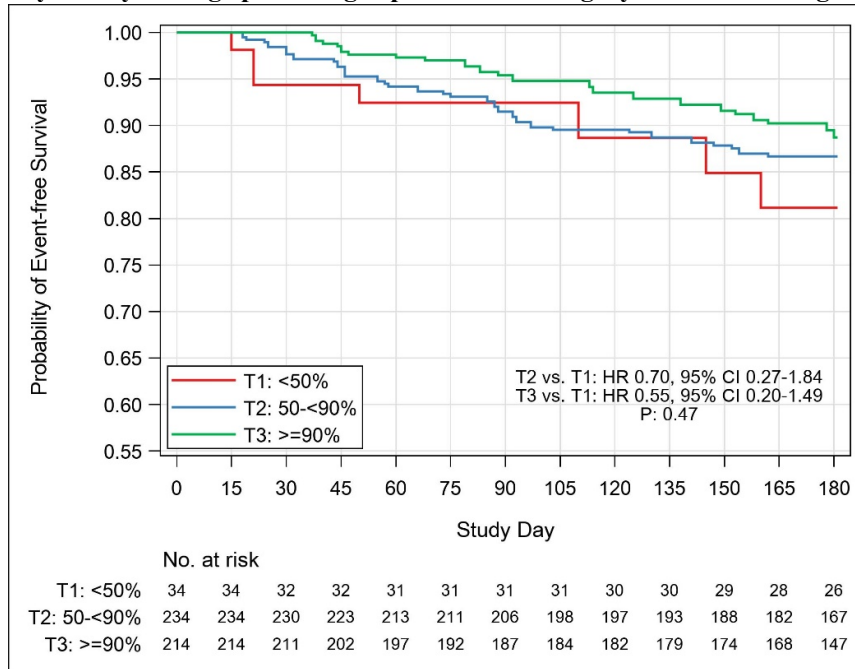

**Figure 12. Kaplan-Meier curves for all-cause mortality or heart failure readmission through day 180 by average percentage optimal dose category at Week 2 – All Subjects**

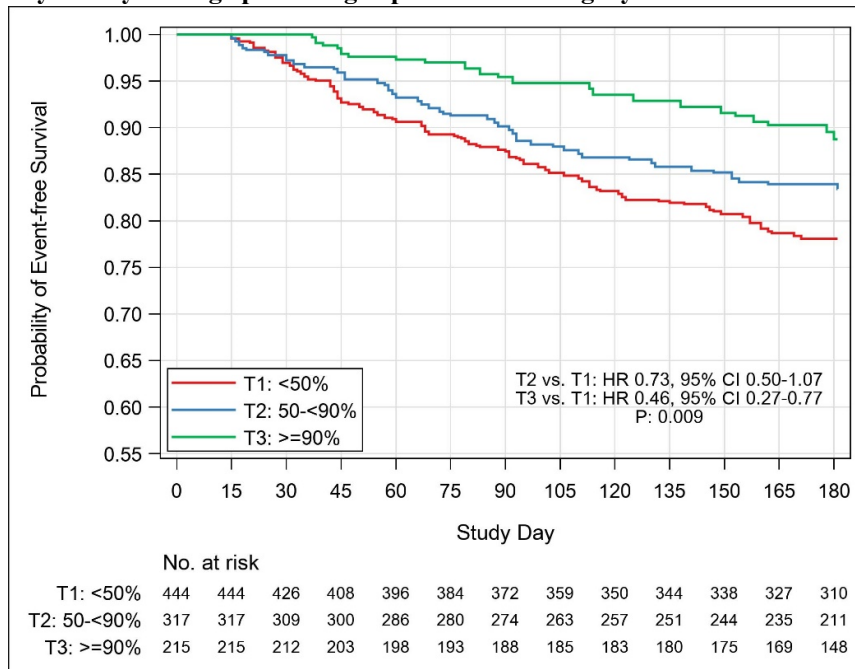



**Figure 13. Kaplan-Meier curves for all-cause mortality through day 180 by average optimal percentage dose category at Week 2 – High Intensity Care Subjects**

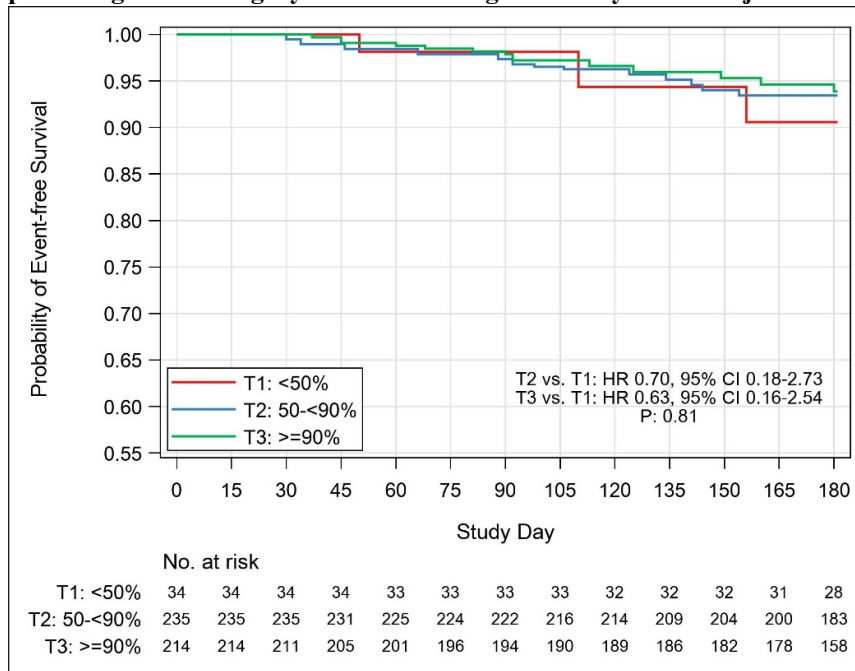

**Figure 14. Kaplan-Meier curves for all-cause mortality through day 180 by average percentage optimal dose category at Week 2 (or Post-Rand for Usual Care) – All Subjects**

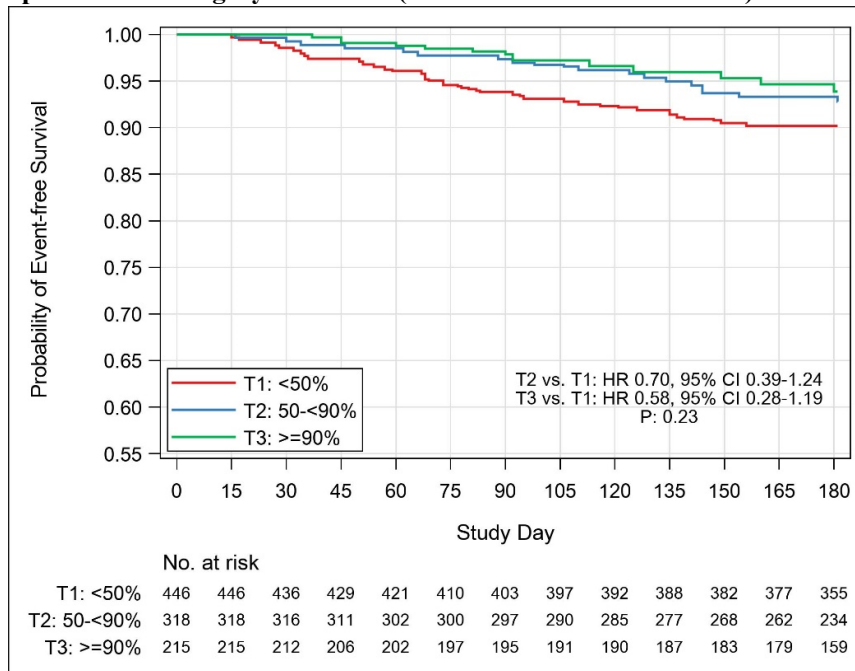

**eFigure 15. Relative hazard of all-cause mortality or heart failure readmission through day 180 by average percentage optimal dose at week 2 in HIC patients**

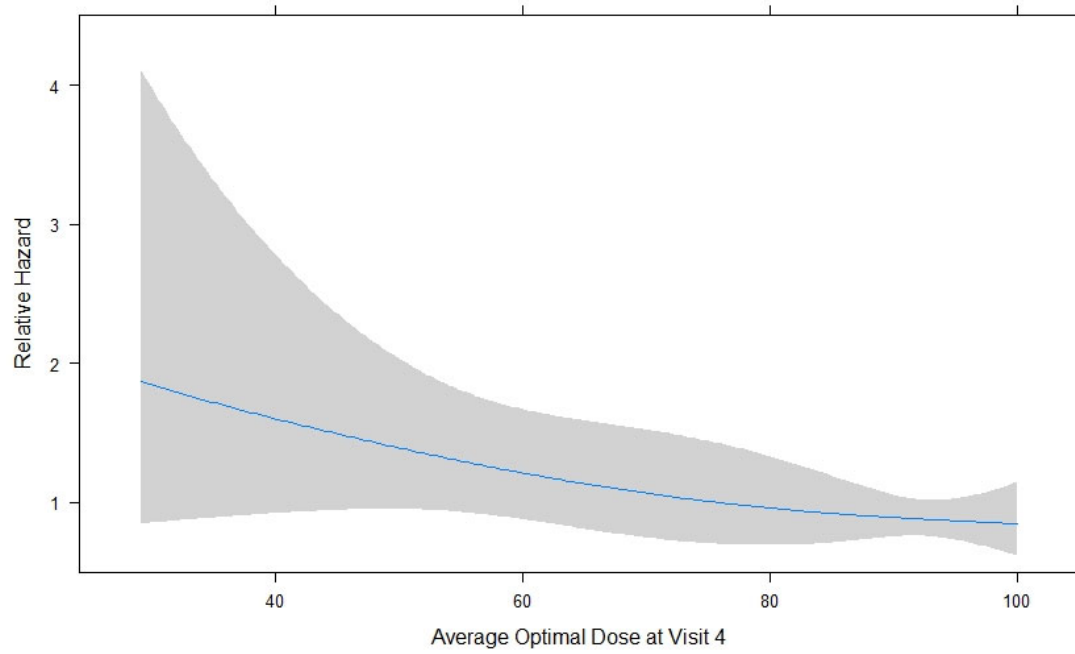

**eFigure 16. Relative hazard of all-cause mortality or heart failure readmission through day 180 by average percentage optimal dose at week 2 in all subjects**

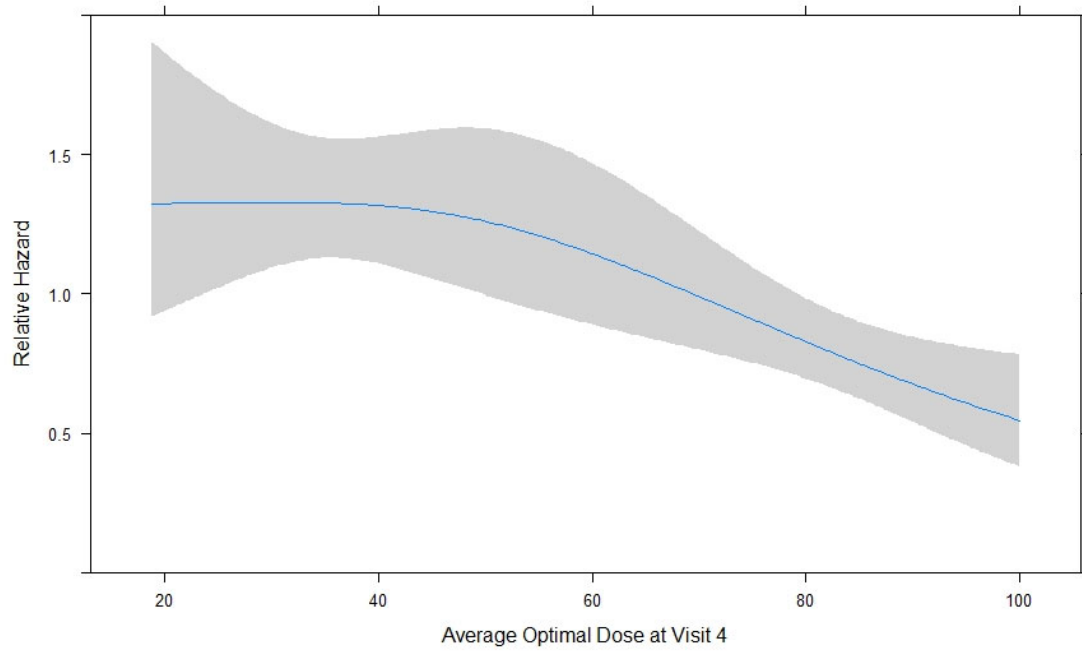

**eFigure 17. Relative hazard of all-cause mortality through day 180 by average percentage optimal dose at week 2 in HIC patients.**

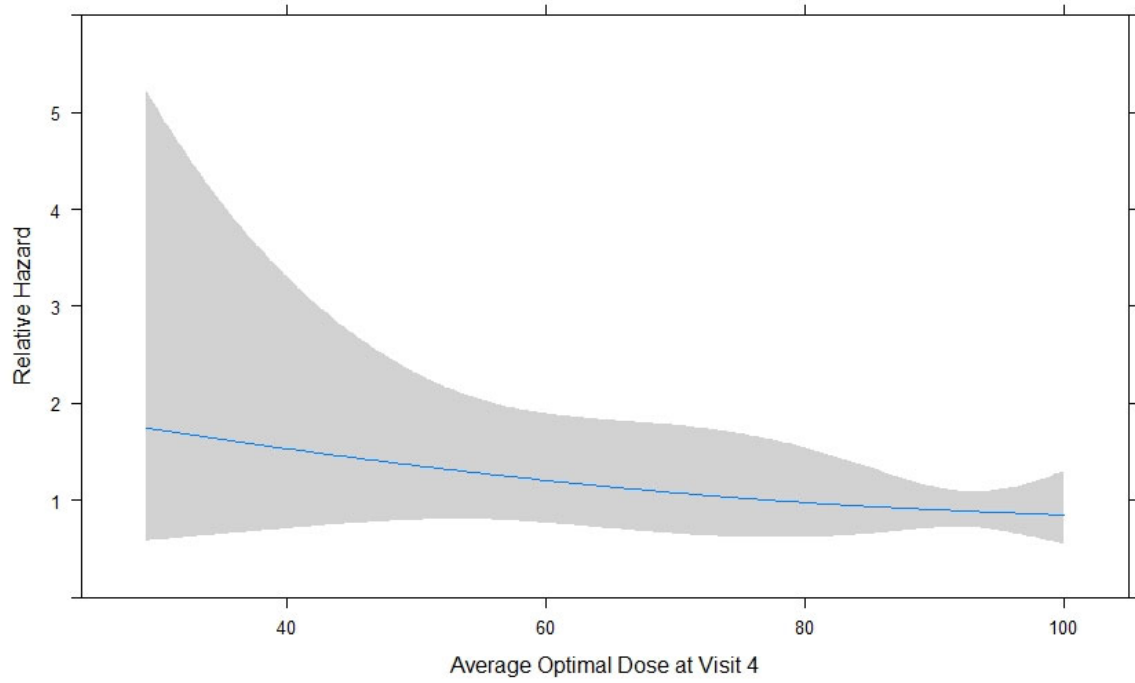

**eFigure 18. Relative hazard of all-cause mortality through day 180 by average percentage optimal dose at week 2 in all patients**

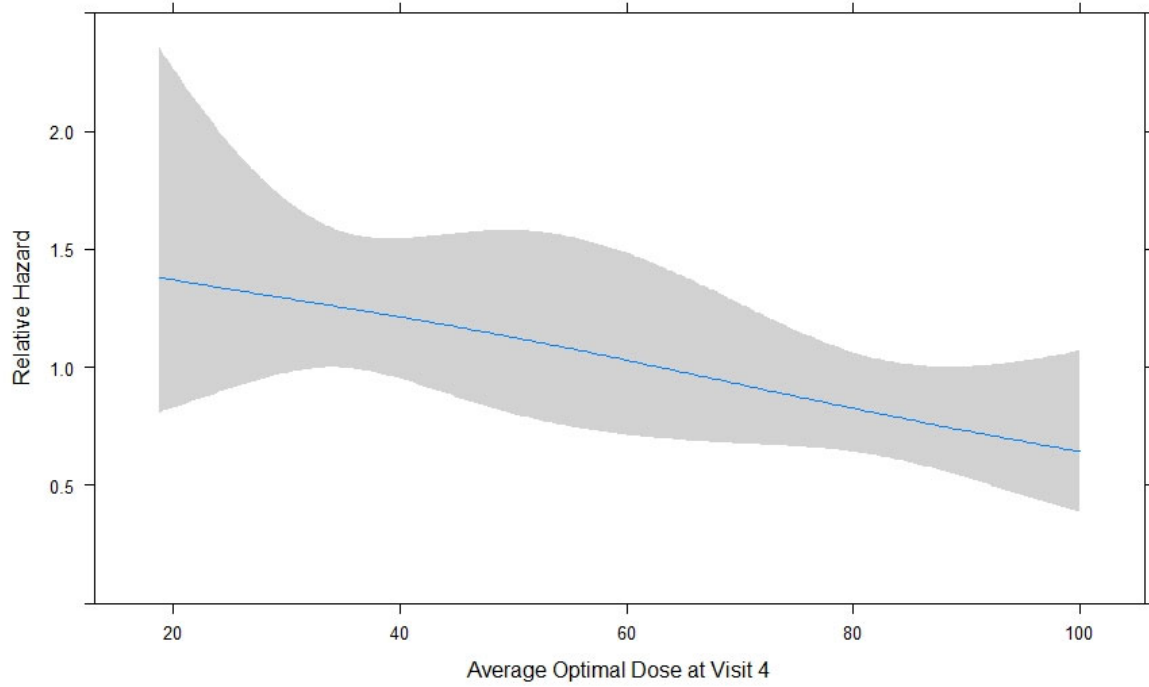

**eFigure 19. Change from baseline in EQ-VAS to day 90 by average percentage optimal dose at week 2 in HIC patients**

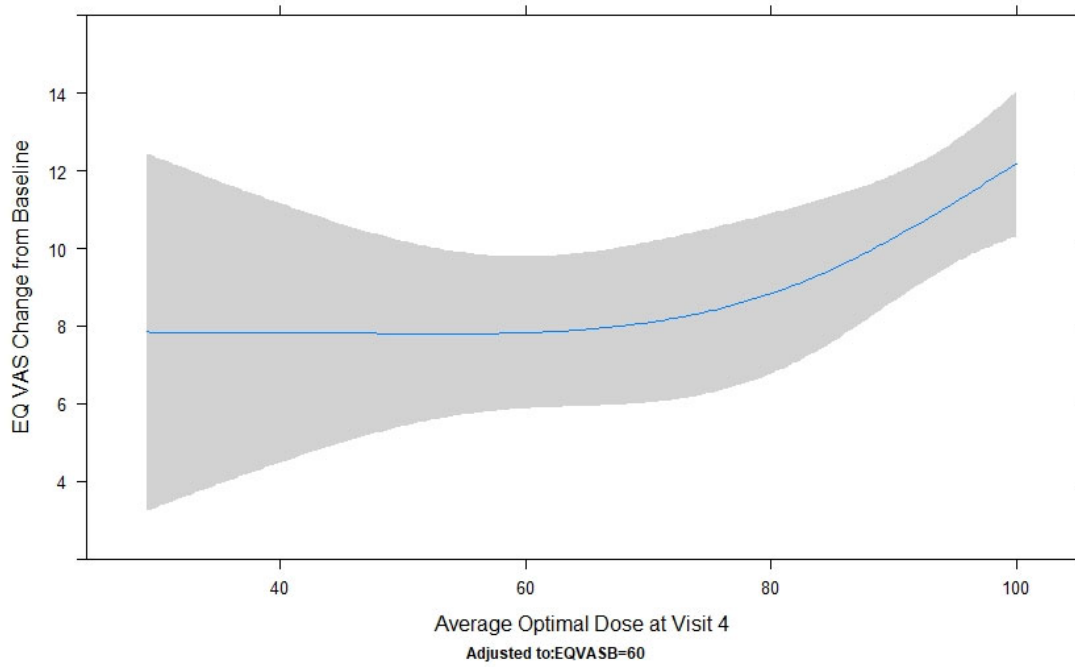

**eFigure 20. Bubble Plot of Percent Optimal Dose of RASi by Beta-Blockers at Week 2**

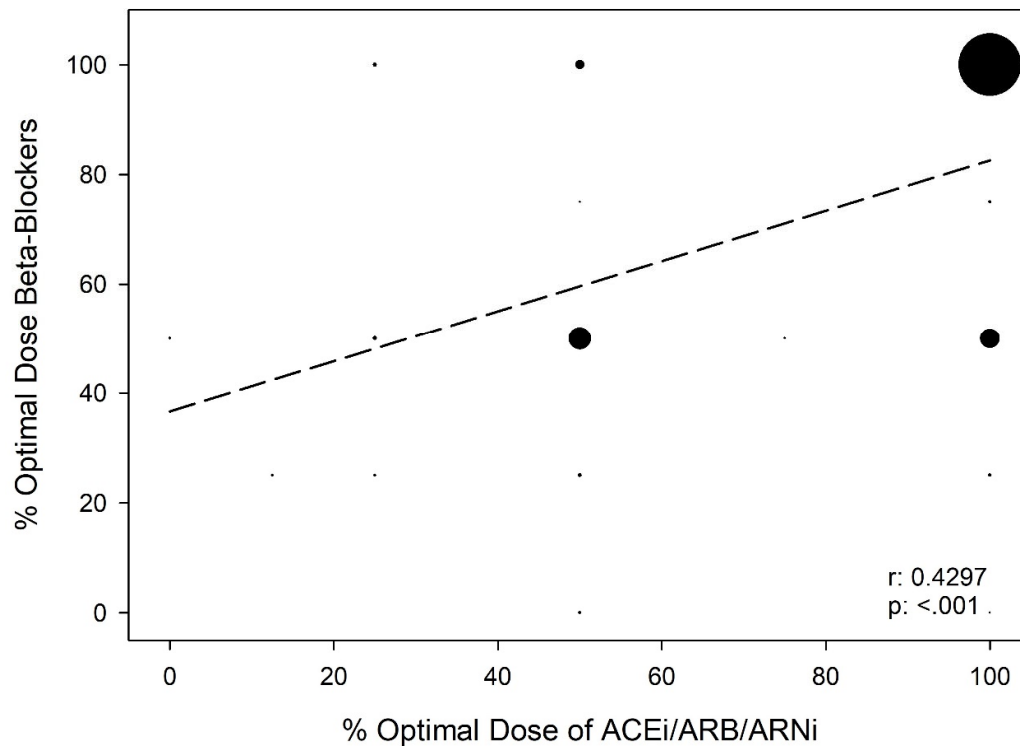

**Figure 21. Bubble Plot of Percent Optimal Dose of RASi by MRA at Week 2**

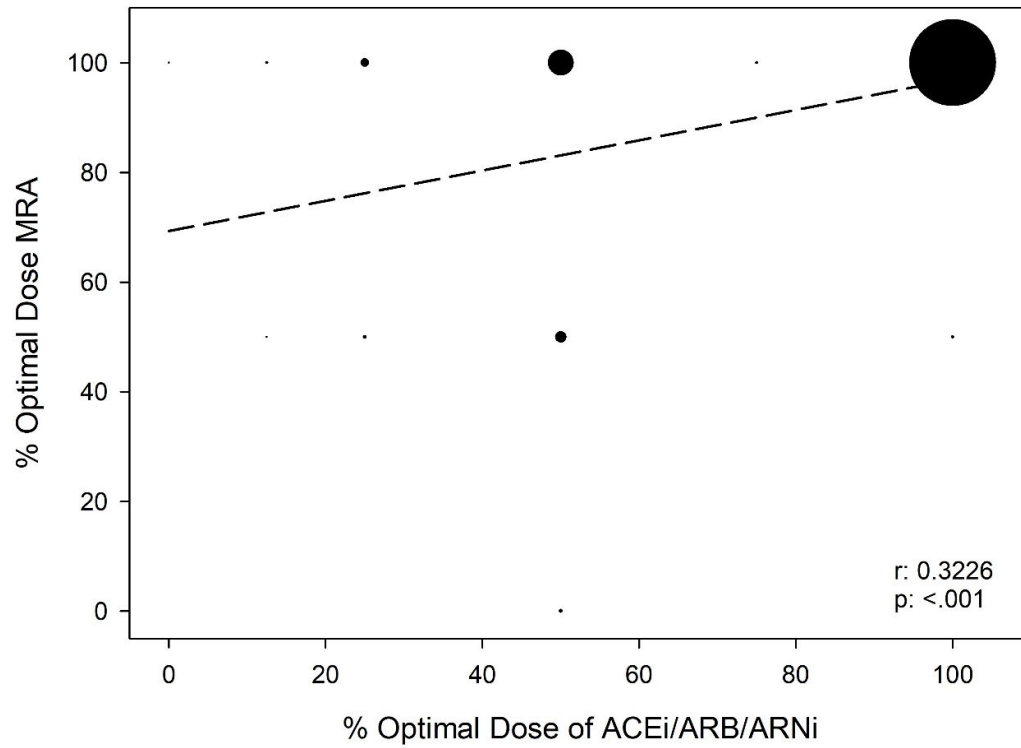

**Figure 22. Bubble Plot of Percent Optimal Dose of  $\beta$ -Blockers by MRA at Week 2**

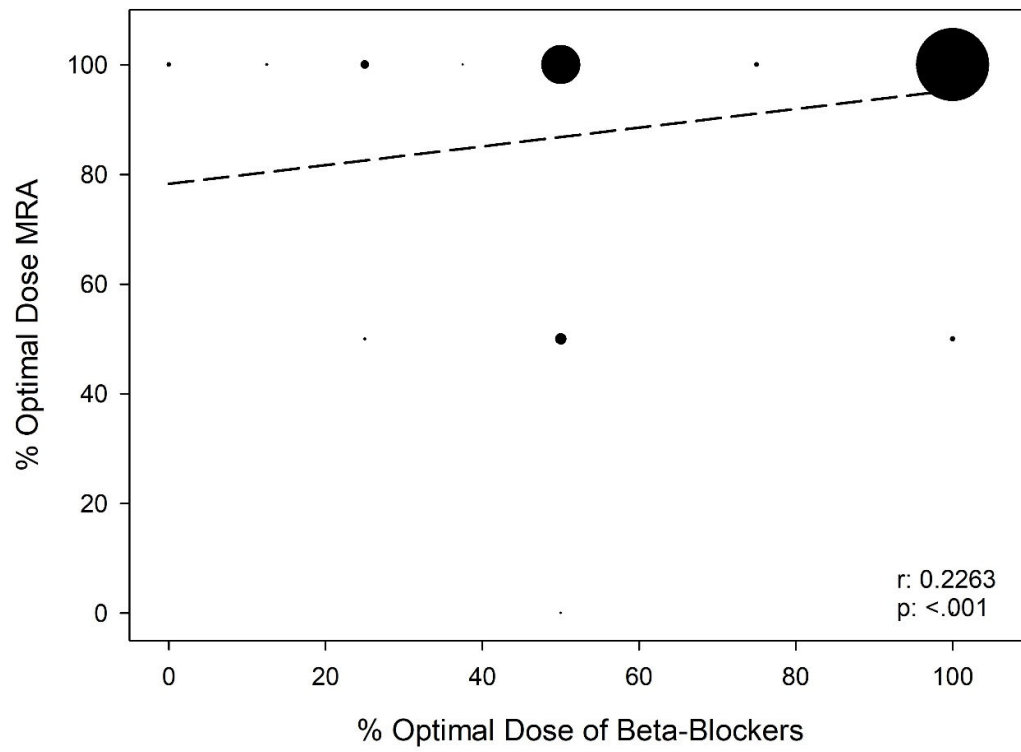

Supplement: jamacardiol-e234553-s001.pdf [file jamacardiol-e234553-s001.pdf]
